# Supplementary material for: Highly crystalline and robust covalent organic framework membranes for predictable solvent transport and molecular separation
Source: Royal Society of Chemistry journal article supplement (doi:10.1039/d3ta04108e), 2023-01-01
Supplement: d3ta04108e1.pdf [file d3ta04108e1.pdf]

## Supplementary Information

### **Highly crystalline and robust covalent organic framework membranes for predictable solvent transport and molecular separation**

Hukang Guo <sup>a, b</sup>, Jianxiao Jiang <sup>a, b</sup>, Chuanjie Fang <sup>a, b, \*</sup>, Liping Zhu <sup>a, b, c, \*</sup>

<sup>a</sup> *MOE Key Laboratory of Macromolecular Synthesis and Functionalization,  
Department of Polymer Science and Engineering, Zhejiang University, Hangzhou  
310058, P.R. China*

<sup>b</sup> *MOE Engineering Research Center of Membrane and Water Treatment Technology,  
Zhejiang University, Hangzhou 310058, P.R. China*

<sup>c</sup> *Center for Healthcare Materials, Shaoxing Institute, Zhejiang University, Shaoxing  
312000, P.R. China*

\* Corresponding author

Dr. Fang, fangchuanjie@zju.edu.cn

Prof. Zhu, lpzhu@zju.edu.cn

|                                    |           |
|------------------------------------|-----------|
| <b>1. Supporting Figures .....</b> | <b>3</b>  |
| <b>2. Supporting Tables .....</b>  | <b>14</b> |
| <b>3. References.....</b>          | <b>16</b> |

## 1. Figures

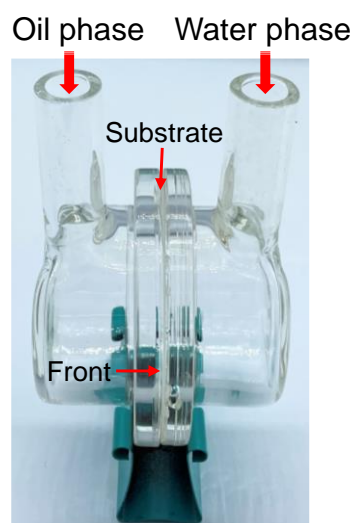

**Fig. S1.** Digital photograph of a homemade diffusion cell used for the growth of a COF-DT layer on a PAN support via interface polymerization.

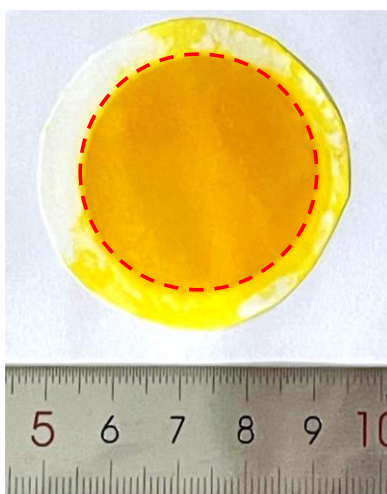

**Fig. S2.** Digital photograph of the COF-DT-2.7/PAN membrane.

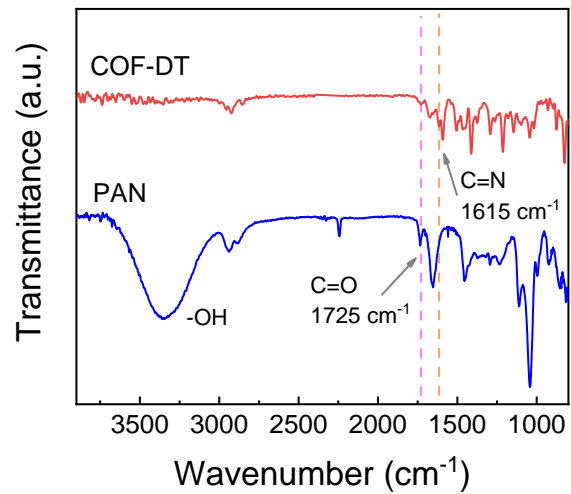

**Fig. S3.** ATR-FTIR spectra of the COF-DT/PAN and pristine PAN membranes.

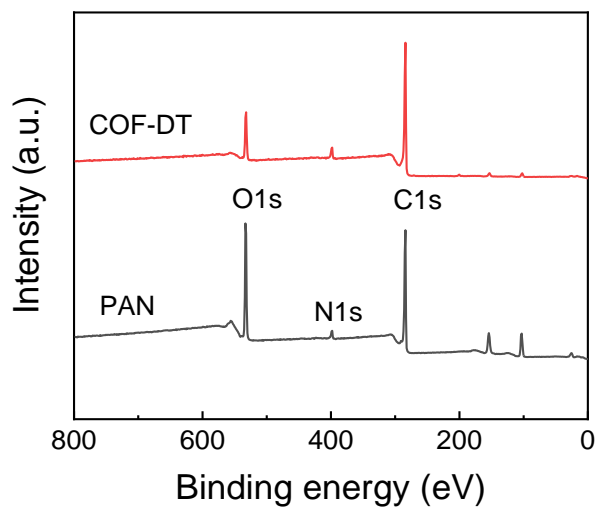

**Fig. S4.** XPS spectra of the COF-DT/PAN and pristine PAN membranes.

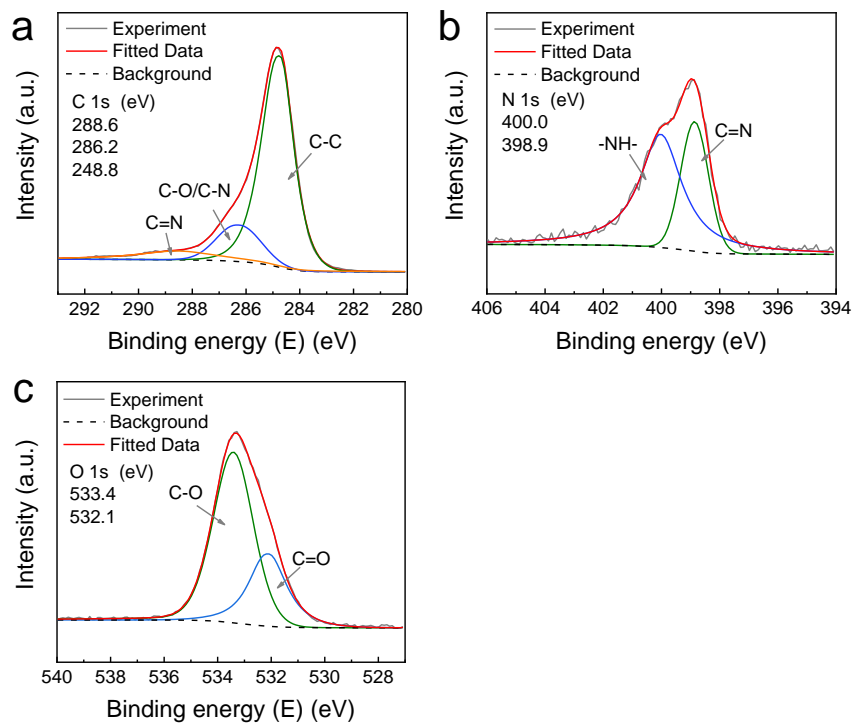

**Fig. S5.** High-resolution XPS spectra of C 1s (a), N 1s (b), and O 1s (c) for the COF-DT/PAN membrane.

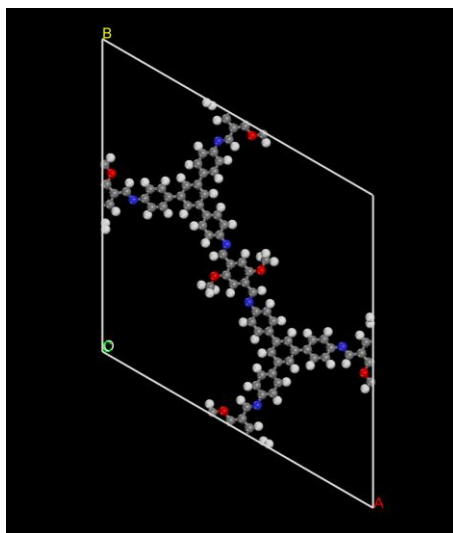

**Fig. S6.** Unit cell of the AA stacking mode of the COF-DT (O, red; N, blue; C, grey).

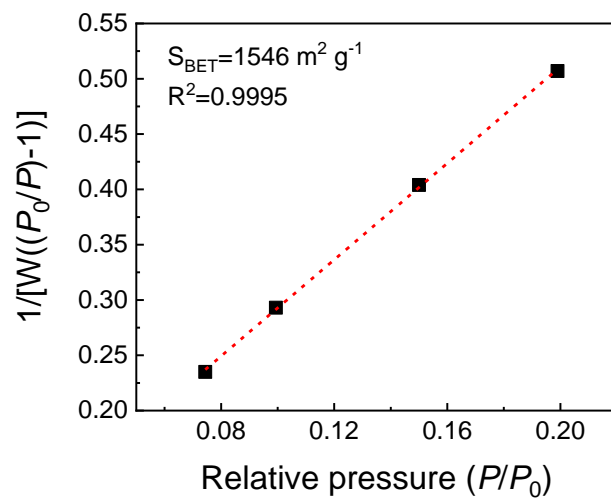

**Fig. S7.** BET plot calculated from the N<sub>2</sub> adsorption isotherm.

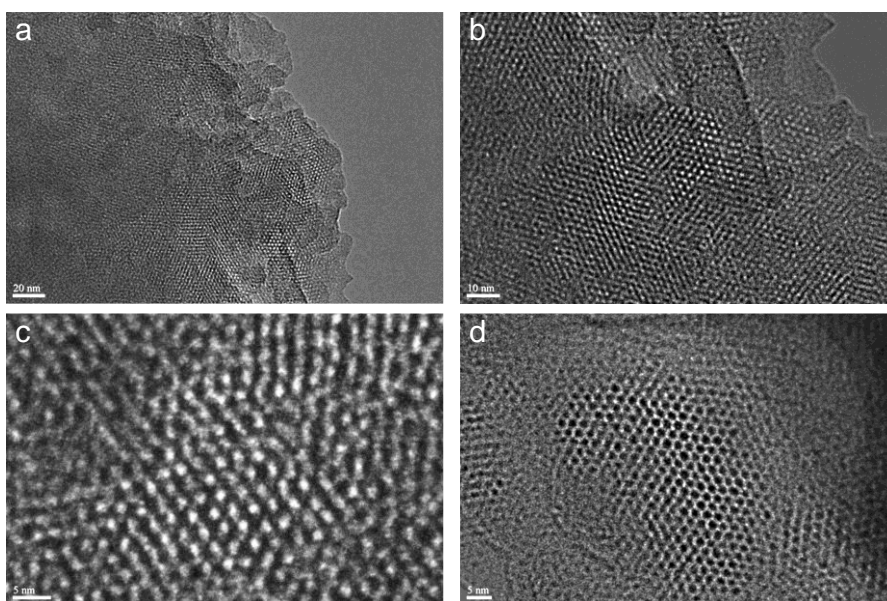

**Fig. S8.** HRTEM images of the COF-DT-2.7 film under different magnifications.

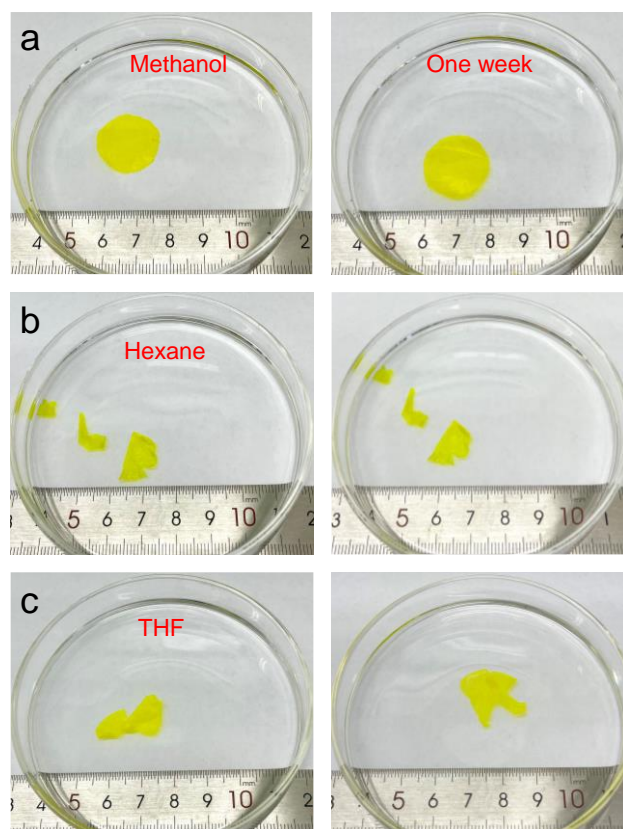

**Fig. S9.** Digital photographs of COF-DT-2.7 films before and after treatment for one week in methanol (a), hexane (b), and THF (c).

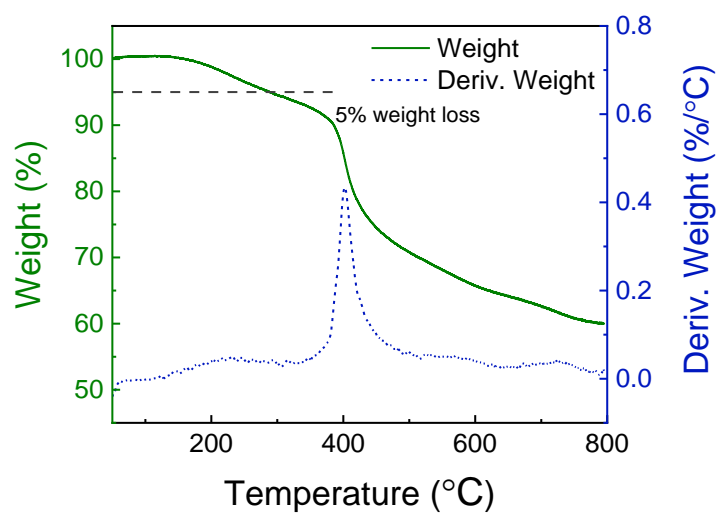

**Fig. S10.** TGA and DTG curves of the COF-DT-2.7 film under N<sub>2</sub>.

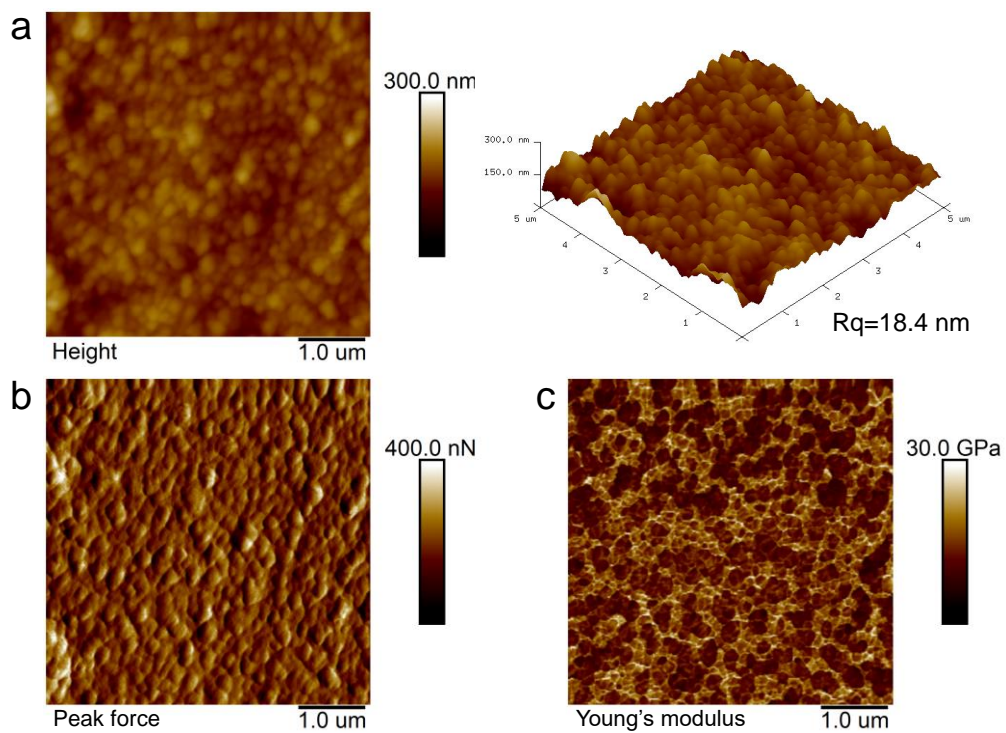

**Fig. S11.** AFM images of the COF-DT-2.7 film measured by height (a), peak force (b), and Young's modulus (c) modes.



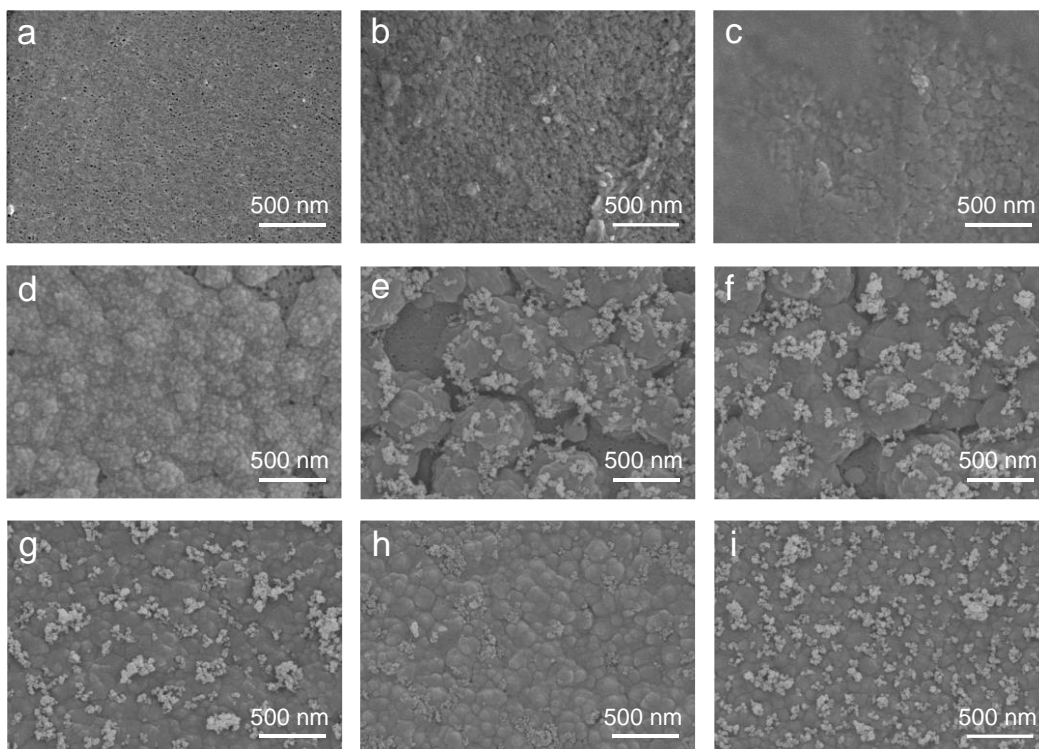

**Fig. S12.** Surface SEM images of the PAN (a), COF-DT-0.9/PAN (b), COF-DT-1.2/PAN (c), COF-DT-1.5/PAN (d), COF-DT-1.8/PAN (e), COF-DT-2.1/PAN (f), COF-DT-2.4/PAN (g), COF-DT-2.7/PAN (h), COF-DT-3.0/PAN (i) membranes.

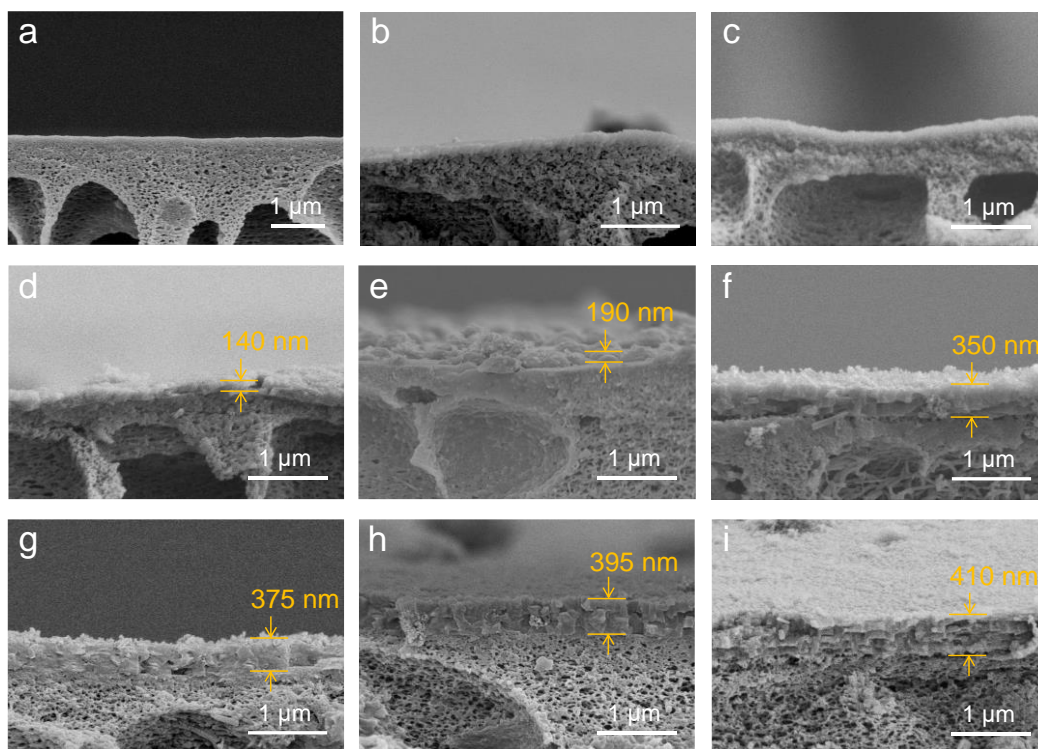

**Fig. S13.** Cross-section SEM images of the PAN (a), COF-DT-0.9/PAN (b), COF-DT-1.2/PAN (c), COF-DT-1.5/PAN (d), COF-DT-1.8/PAN (e), COF-DT-2.1/PAN (f), COF-DT-2.4/PAN (g), COF-DT-2.7/PAN (h), COF-DT-3.0/PAN (i) membranes.

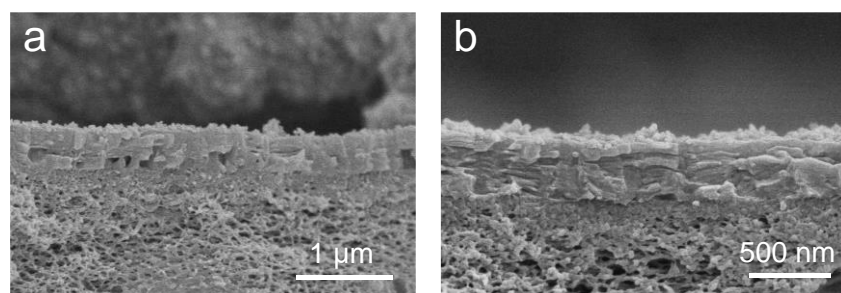

**Fig. S14.** Cross-section SEM images of the COF-DT-3.0/PAN membrane with different magnification factors.

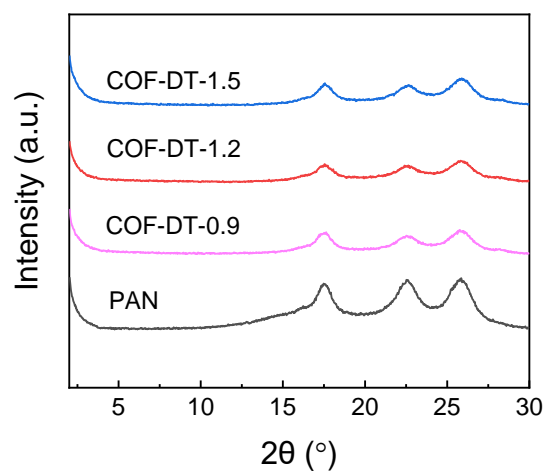

**Fig. S15.** XRD patterns of various COF-DT/PAN membranes prepared using different TAPB concentrations.

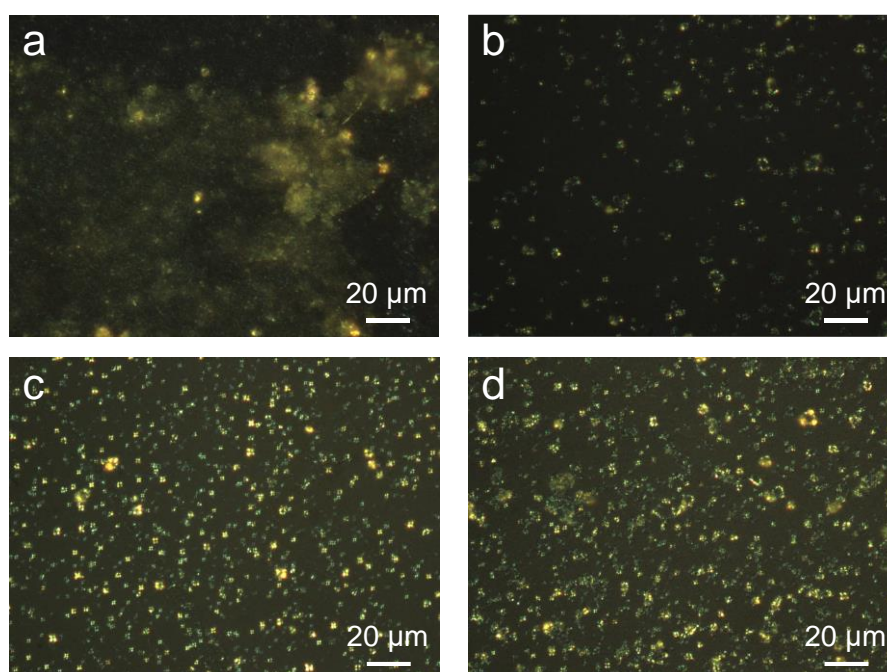

**Fig. S16.** Microscopic images of the COF-DT-2.1 (a), COF-DT-2.4 (b), COF-DT-2.7 (c), COF-DT-3.0 (d) films.

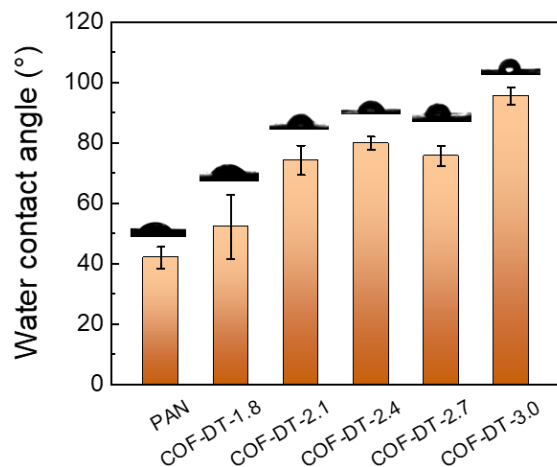

**Fig. S17.** Water contact angles of the PAN (a), COF-DT-1.8/PAN (b), COF-DT-2.1/PAN (c), COF-DT-2.4/PAN (d), COF-DT-2.7/PAN (e), COF-DT-3.0/PAN (f) membranes.

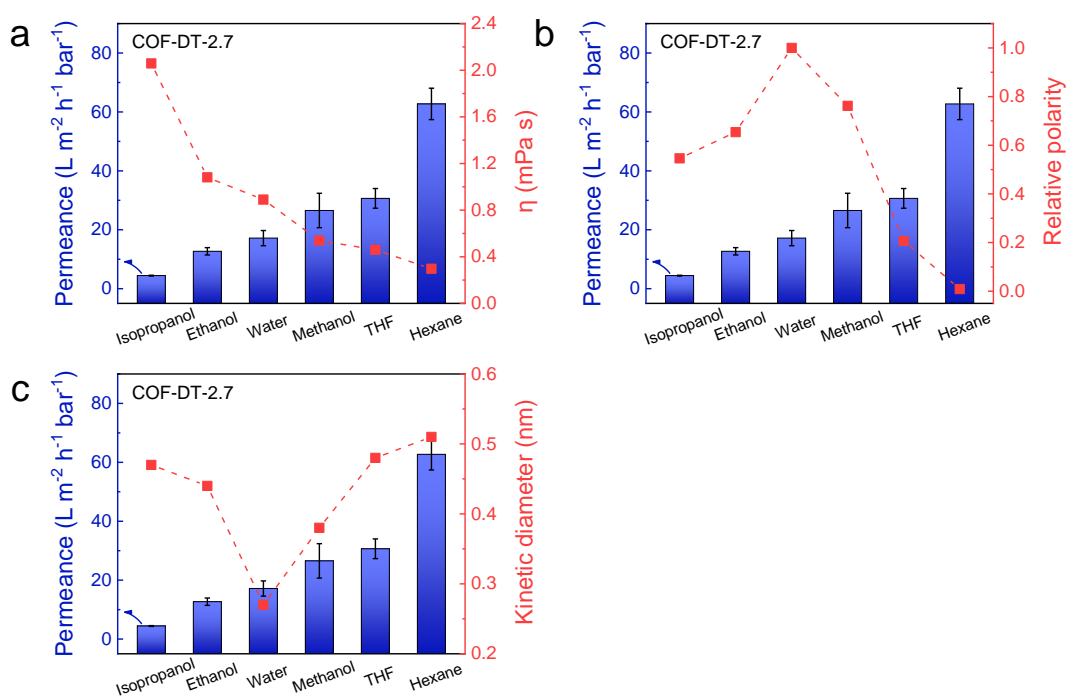

**Fig. S18.** The plots of solvent viscosity (a), relative polarity (b), and kinetic diameter (c) versus solvent permeance through the COF-DT-2.7/PAN membrane.

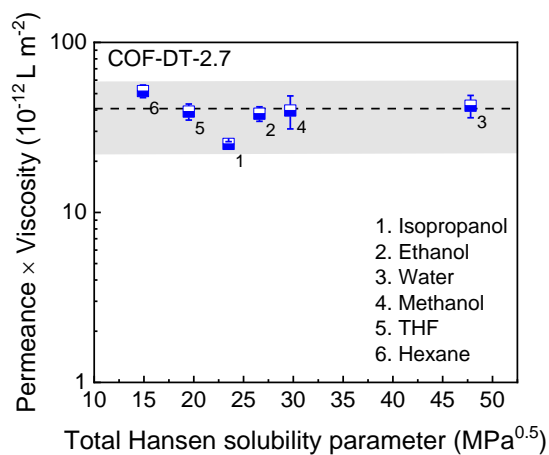

**Fig. S19.** Product of solvent permeance and viscosity as a function of the total Hansen solubility parameter for the COF-DT-2.7/PAN membrane.

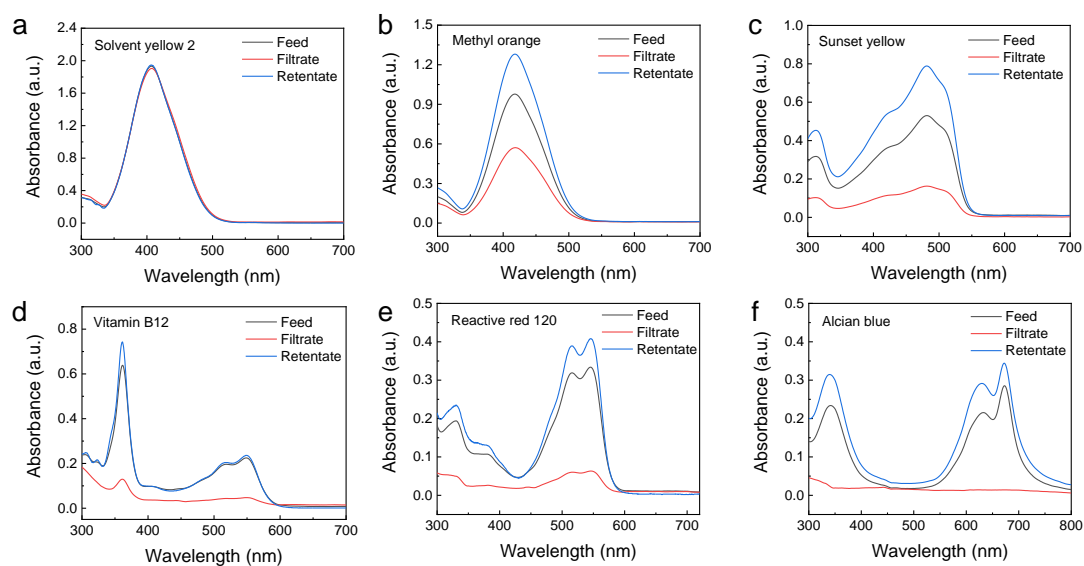

**Fig. S20.** UV-vis absorption spectra of various dye solution in ethanol (20 ppm) before and after filtration through the COF-DT-2.7/PAN membrane.

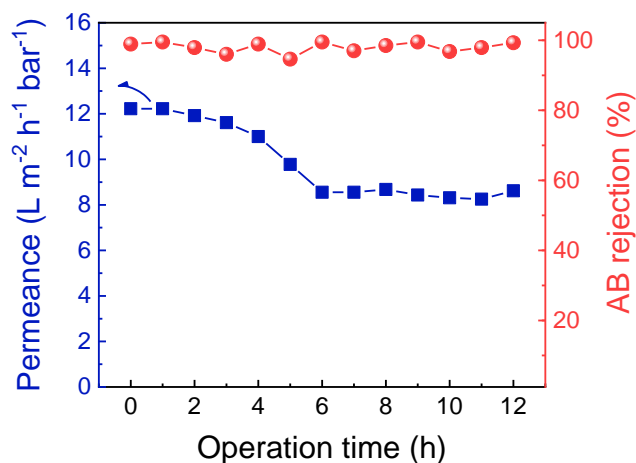

**Fig. S21.** Long-term separation stability of the COF-DT-2.7/PAN membrane toward the ethanolic AB solution in a crossflow filtration under 4 bar.

## 2. Tables

**Table S1.** Detailed properties of different dye molecules used in this work.

| Dye              | Structure                                                                           | Molecular size (Å) | Molecular weight (g/mol) | Charge | UV-vis absorption peak (nm) |
|------------------|-------------------------------------------------------------------------------------|--------------------|--------------------------|--------|-----------------------------|
| Solvent yellow 2 | 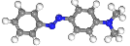 | 15.7×7.0×4.1       | 225.29                   | 0      | 408                         |
| Methyl orange    |  | 18.6×7.4×6.6       | 327.33                   | –      | 420                         |
| Sunset yellow    |  | 19.7×9.8×7.1       | 452.36                   | –      | 482                         |
| Vitamin B12      |  | 22.6×17.1×7.0      | 1355.38                  | 0      | 362                         |
| Reactive red 120 |  | 25.3×17.2×12.4     | 1469.98                  | –      | 545                         |

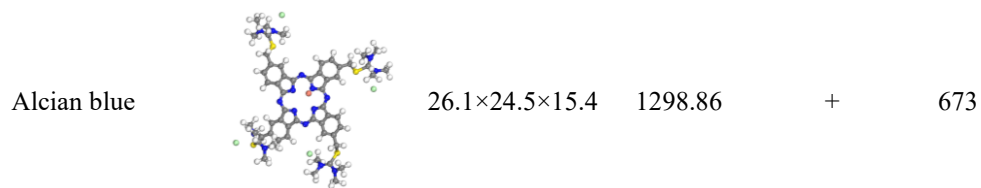

**Table S2.** Element compositions of membranes.

| Membranes | C (%) | N (%) | O (%) |
|-----------|-------|-------|-------|
| PAN       | 66.8  | 3.9   | 29.3  |
| COF-DT    | 80.4  | 5.5   | 14.1  |

**Table S3.** Solvent properties.

| Solvent     | Viscosity at 25 °C<br>(mPa s) <sup>1</sup> | Relative polarity <sup>2,3</sup> | Kinetic diameter<br>(nm) <sup>1,4</sup> | Total solubility<br>(MPa <sup>0.5</sup> ) <sup>1</sup> | Hansen<br>parameter |
|-------------|--------------------------------------------|----------------------------------|-----------------------------------------|--------------------------------------------------------|---------------------|
| Isopropanol | 2.06                                       | 0.546                            | 0.47                                    | 23.5                                                   |                     |
| Ethanol     | 1.08                                       | 0.654                            | 0.44                                    | 26.6                                                   |                     |
| Water       | 0.92                                       | 1                                | 0.27                                    | 47.8                                                   |                     |
| Methanol    | 0.54                                       | 0.762                            | 0.38                                    | 29.7                                                   |                     |
| THF         | 0.46                                       | 0.207                            | 0.48                                    | 19.5                                                   |                     |
| Hexane      | 0.29                                       | 0.009                            | 0.51                                    | 14.9                                                   |                     |

### 3. References

1. A. Buekenhoudt, F. Bisignano, G. De Luca, P. Vandezande, M. Wouters and K. Verhulst, *J. Membr. Sci.*, 2013, **439**, 36-47.
2. Q. Yang, Y. Su, C. Chi, C. T. Cherian, K. Huang, V. G. Kravets, F. C. Wang, J. C. Zhang, A. Pratt, A. N. Grigorenko, F. Guinea, A. K. Geim and R. R. Nair, *Nat. Mater.*, 2017, **16**, 1198-1202.
3. P. J. Linstrom and W. G. Mallard, *J. Chem. Eng. Data*, 2001, **46**, 1059-1063.
4. J. Liu, S. Wang, T. Huang, P. Manchanda, E. Abou-Hamad and S. P. Nunes, *Sci Adv*, 2020, **6**, eabb3188.
